# Supplementary material for: One-year outcomes of traumatic injuries among survivors in Ethiopia: a cross-sectional study on the employment outcomes and functioning state
Source: PubMed Central journal article supplement — Trauma Surg Acute Care Open. 2024 Apr 16;9(1):e001209. doi: 10.1136/tsaco-2023-001209 (PMC11029386; doi:10.1136/tsaco-2023-001209), 2024-04-16
Supplement: tsaco-2023-001209supp001.pdf [file tsaco-2023-001209supp001.pdf]

**Unique Identification Code (UIC):** \_\_\_\_\_

### Data Collection Instrument for Telephone Interview among Injury Survivors

**Date of Interview:** \_\_\_\_\_

**Name of data Collector:** \_\_\_\_\_

**Individuals involved in the interview:** a) Injury survivor only      b) Survivor plus an assistant

**Language used during the interview:** a) Amharic      b) Afaan Oromo

I will try read the questions to you, clearly. But feel free to stop me if my voice or the question itself is not clear for you so I can adjust and repeat questions.

Let us start with some background information.

| Ser. No. | Sociodemographic Information                                   | Response Options                                                                                                                                                                                                                                               | Instruction/Skip |
|----------|----------------------------------------------------------------|----------------------------------------------------------------------------------------------------------------------------------------------------------------------------------------------------------------------------------------------------------------|------------------|
| 1.       | What is the highest grade that you completed in school?        | a. Can't read and write<br>b. Elementary (1-4 <sup>th</sup> grade)<br>c. Junior (5 <sup>th</sup> - 8 <sup>th</sup> grade)<br>d. Highschool (9 <sup>th</sup> -12 <sup>th</sup> grade)<br>e. College/University (undergraduate/certificate)<br>f. Graduate study |                  |
| 2.       | What is your religion?                                         | a. Orthodox<br>b. Muslim<br>c. Protestant<br>d. Catholic<br>g. Others (specify): _____                                                                                                                                                                         |                  |
| 3.       | What is your marital status?                                   | a. Single / never married<br>b. Married<br>c. Divorced / separated<br>d. Widow/er                                                                                                                                                                              |                  |
| 4.       | How many family members are living with you in the same house? | _____                                                                                                                                                                                                                                                          |                  |
| 5.       | Do you live in an urban or rural area?                         | a. Urban      b. Rural                                                                                                                                                                                                                                         |                  |

**Unique Identification Code (UIC):** \_\_\_\_\_

| Injury Related Information |                                                                                                                                                                          | Instruction/ Skip                                                                                                                                          |
|----------------------------|--------------------------------------------------------------------------------------------------------------------------------------------------------------------------|------------------------------------------------------------------------------------------------------------------------------------------------------------|
| 6.                         | Did the traumatic injury happened while you are on activities related to your work?                                                                                      | a. Yes<br>b. No                                                                                                                                            |
| 7.                         | How long did you stay admitted in the hospital because of the injury?                                                                                                    | _____ days                                                                                                                                                 |
| 8.                         | Have you ever received rehabilitation treatment or support for effects associated with the traumatic injury?                                                             | a. Yes<br>b. No                                                                                                                                            |
|                            |                                                                                                                                                                          | If No, skip to Q#10                                                                                                                                        |
| 9.                         | If yes to above, from where did you receive rehabilitation service/support and what type of support have you received?<br><b>Note:</b> More than one option is possible. | a. From a rehabilitation institution: _____<br>b. From traditional medicine: _____<br>c. From a religious institution: _____<br>d. Others (specify): _____ |

10. Tell me if there is any assistive device you are using as a result of the injury:

- I am not using, because I do not need it
- I am not using, because I don't have access or capacity
- Yes, I am using: Type/s: \_\_\_\_\_; \_\_\_\_\_

11. We would like to know about any potential residual impairments. I am going to read questions and you will choose one that best describe about your current level of difficulty in functioning domains. There are five options, '0-4, these include:

- 0 = I have no difficulty
- 1 = Mild difficulty
- 2 = Moderate difficulty
- 3 = Severe difficulty
- 4 = Extreme difficulty

**Unique Identification Code (UIC):** \_\_\_\_\_

| <b>Domains</b>                     | <b>How difficult is it for you to do the following?</b>                                                                                           | <b>No difficulty</b> | <b>Mild difficulty</b> | <b>Moderate difficulty</b> | <b>Severe difficulty</b> | <b>Extreme difficulty</b> |
|------------------------------------|---------------------------------------------------------------------------------------------------------------------------------------------------|----------------------|------------------------|----------------------------|--------------------------|---------------------------|
| <b>Cognition</b>                   | Concentrating on doing something for 10 minutes?                                                                                                  | 0                    | 1                      | 2                          | 3                        | 4                         |
|                                    | Learning a new task, for example, learning how to get to a new place?                                                                             | 0                    | 1                      | 2                          | 3                        | 4                         |
| <b>Mobility</b>                    | Standing for long periods, 30 min?                                                                                                                | 0                    | 1                      | 2                          | 3                        | 4                         |
|                                    | Walking a long distance such as 1km or equivalent?                                                                                                | 0                    | 1                      | 2                          | 3                        | 4                         |
| <b>Self-care</b>                   | Washing your whole body?                                                                                                                          | 0                    | 1                      | 2                          | 3                        | 4                         |
|                                    | Getting dressed?                                                                                                                                  | 0                    | 1                      | 2                          | 3                        | 4                         |
| <b>Interpersonal relationships</b> | Dealing with people you don't know?                                                                                                               | 0                    | 1                      | 2                          | 3                        | 4                         |
|                                    | Maintaining a friendship?                                                                                                                         | 0                    | 1                      | 2                          | 3                        | 4                         |
| <b>Activities of daily living</b>  | Taking care of your day-to-day activity, e.g., housework, leading the family, childcare, managing cattle's etc.                                   | 0                    | 1                      | 2                          | 3                        | 4                         |
|                                    | Managing your day-to-day work/study?                                                                                                              | 0                    | 1                      | 2                          | 3                        | 4                         |
| <b>Participation</b>               | Joining in community activities, for example, how often do you find yourself at religious or social event/gatherings, just like any other person? | 0                    | 1                      | 2                          | 3                        | 4                         |
|                                    | How much have you been emotionally affected by your health problems?                                                                              | 0                    | 1                      | 2                          | 3                        | 4                         |

**Unique Identification Code (UIC):** \_\_\_\_\_

12. Do you have any of the following chronic health conditions confirmed by a health professional? I will read the lists for you and indicate if they are 'Yes or No'.

| Health Conditions                                                                                                          | Response                                                 |
|----------------------------------------------------------------------------------------------------------------------------|----------------------------------------------------------|
| 12.1 Hypertension                                                                                                          | <input type="checkbox"/> Yes <input type="checkbox"/> No |
| 12.3 Heart disease                                                                                                         | <input type="checkbox"/> Yes <input type="checkbox"/> No |
| 12.5 Angina (chest pain)                                                                                                   | <input type="checkbox"/> Yes <input type="checkbox"/> No |
| 12.7 Arthritis (rheumatoid and osteoarthritis)                                                                             | <input type="checkbox"/> Yes <input type="checkbox"/> No |
| 12.9 Osteoporosis                                                                                                          | <input type="checkbox"/> Yes <input type="checkbox"/> No |
| 12.11 Neurological disorders                                                                                               | <input type="checkbox"/> Yes <input type="checkbox"/> No |
| 12.13 Peripheral vascular disease                                                                                          | <input type="checkbox"/> Yes <input type="checkbox"/> No |
| 12.15 Depression                                                                                                           | <input type="checkbox"/> Yes <input type="checkbox"/> No |
| 12.17 Anxiety or panic disorders                                                                                           | <input type="checkbox"/> Yes <input type="checkbox"/> No |
| 12.19 Diabetes (type I or II)                                                                                              | <input type="checkbox"/> Yes <input type="checkbox"/> No |
| 12.21 Degenerative disc disease (back/spinal pain)                                                                         | <input type="checkbox"/> Yes <input type="checkbox"/> No |
| 12.23 Stroke                                                                                                               | <input type="checkbox"/> Yes <input type="checkbox"/> No |
| 12.25 Unspecified pain                                                                                                     | <input type="checkbox"/> Yes <input type="checkbox"/> No |
| 12.27 Dementia                                                                                                             | <input type="checkbox"/> Yes <input type="checkbox"/> No |
| 12.29 Gastrointestinal disease                                                                                             | <input type="checkbox"/> Yes <input type="checkbox"/> No |
| 12.31 Asthma                                                                                                               | <input type="checkbox"/> Yes <input type="checkbox"/> No |
| 12.33 Chronic respiratory/lung disease (COPD)                                                                              | <input type="checkbox"/> Yes <input type="checkbox"/> No |
| 12.35 Skin problem                                                                                                         | <input type="checkbox"/> Yes <input type="checkbox"/> No |
| 12.37 Any allergy (specify): _____                                                                                         | <input type="checkbox"/> Yes <input type="checkbox"/> No |
| Do you have the following sensory impairments (sight and hearing); if yes, indicate if this is before or after the injury? |                                                          |
| 12.40 Reduced visual acuity or complete inability to see                                                                   | <input type="checkbox"/> Yes <input type="checkbox"/> No |
| 12.42 Reduced hearing capacity/complete inability to hear                                                                  | <input type="checkbox"/> Yes <input type="checkbox"/> No |

**Unique Identification Code (UIC):** \_\_\_\_\_

| <b>Employment Related Information</b> |                                                                                                                                                                                                                                                    |                                                                                                                                                                                                                                                                                                                                                                                                                                                                                                                                                                                                                  | <b>Instruction / Skip</b>          |
|---------------------------------------|----------------------------------------------------------------------------------------------------------------------------------------------------------------------------------------------------------------------------------------------------|------------------------------------------------------------------------------------------------------------------------------------------------------------------------------------------------------------------------------------------------------------------------------------------------------------------------------------------------------------------------------------------------------------------------------------------------------------------------------------------------------------------------------------------------------------------------------------------------------------------|------------------------------------|
| 13.                                   | Are you currently returned to any work/job?                                                                                                                                                                                                        | a. Yes<br>b. No                                                                                                                                                                                                                                                                                                                                                                                                                                                                                                                                                                                                  |                                    |
| 14.                                   | How do you describe your current status to RTW?<br>Listen to what I am saying and choose one of the statements that best describe your current state.<br><br><b>Note:- ask questions:</b><br>'a-c' for off-work groups<br>'d-f' for working groups | <p style="text-align: center;"><b><u>For off-work groups</u></b></p> a. I am not thinking about starting work<br>b. I have started to think about returning to work, but has no concrete plan<br>c. I have started to seek information and have concrete plans for RTW (preparation)<br><br><p style="text-align: center;"><b><u>For on-work groups</u></b></p> d. I have returned to work, but struggling to maintain (uncertain maintenance)<br>e. I have returned and found good strategy to manage the work (active maintenance)<br>f. I have returned and attempting to promotion/improvement (advancement) |                                    |
| 15.                                   | How do you rate your current work ability compare to your ability before the traumatic injury?                                                                                                                                                     | 0 = I can't work at all<br>1 = Very low work ability<br>2 = Low work ability<br>3 = Medium work ability<br>4 = High work ability<br>5 = Very high work ability                                                                                                                                                                                                                                                                                                                                                                                                                                                   | If currently working, skip to Q#17 |

**Unique Identification Code (UIC):** \_\_\_\_\_

|     |                                                                                                                                          |                                                                                                                                                                                                                                                                                                                                                                                                                            |                    |
|-----|------------------------------------------------------------------------------------------------------------------------------------------|----------------------------------------------------------------------------------------------------------------------------------------------------------------------------------------------------------------------------------------------------------------------------------------------------------------------------------------------------------------------------------------------------------------------------|--------------------|
| 16. | If not working currently, have you ever returned to work after the injury?                                                               | <ul style="list-style-type: none"> <li>a. Yes</li> <li>b. No (never returned)</li> </ul>                                                                                                                                                                                                                                                                                                                                   | If b, skip to Q#18 |
| 17. | If you had ever returned to work after the injury, when did you first resume work after the injury?                                      | _____ (Weeks)                                                                                                                                                                                                                                                                                                                                                                                                              |                    |
| 18. | If you are not working currently, why are you not on the job?                                                                            | <ul style="list-style-type: none"> <li>a. Serious disability or illness</li> <li>b. Unable to find job</li> <li>c. Failed to cope up with job-related demands after the injury:</li> <li>d. Retirement</li> <li>e. Pregnancy or maternity/parental leave</li> <li>f. Studying or on training</li> <li>g. Caring for child/ren of own/relative(s)</li> <li>g. Personal choice</li> <li>h. Other (specify): _____</li> </ul> |                    |
| 19. | Have you experienced any impact on your job due to the current national situation or related to COVID-19?<br>If yes, please let me know: | <ul style="list-style-type: none"> <li>a. No, I did not have/experienced any impact</li> <li>b. Yes, in connection with current national conditions: _____</li> <li>c. Yes, in connection with the COVID-19: _____</li> </ul>                                                                                                                                                                                              |                    |
| 20. | Do you have any vocational skill set or profession with formal education or training?                                                    | <ul style="list-style-type: none"> <li>a. Yes: tell me what it is:<br/>Professional: _____<br/>Vocational: _____</li> <li>b. No, I did not receive any formal education or vocational training</li> </ul>                                                                                                                                                                                                                  |                    |

**Unique Identification Code (UIC):** \_\_\_\_\_

| <b>Instruction for data collectors:</b><br>If returned, ask <u>both the pre and post injury</u><br>If not returned, ask <u>only the preinjury</u> |                                                                                                                                                                                                                              | <b>Preinjury job</b> | <b>Current job</b> | <b>Same/different/remark</b> |
|---------------------------------------------------------------------------------------------------------------------------------------------------|------------------------------------------------------------------------------------------------------------------------------------------------------------------------------------------------------------------------------|----------------------|--------------------|------------------------------|
| 21.                                                                                                                                               | What is the type of job you do?                                                                                                                                                                                              |                      |                    |                              |
| 22.                                                                                                                                               | Where/in which organization/sector do you work?                                                                                                                                                                              |                      |                    |                              |
| 23.                                                                                                                                               | What is your employment relationship?<br>1. Definite/temporary: contractual for a specific period<br>2. Indefinite/permanent<br>3. Daily labour/seasonal: without contract/unstable jobs<br>4. Self-employed/family business |                      |                    |                              |
| 24.                                                                                                                                               | Approximately how many people work in your workplace?<br>a. <10 workers<br>b. 10-30 workers<br>c. 31-100 workers<br>d. >100 workers: _____                                                                                   |                      |                    |                              |
| 25.                                                                                                                                               | How long have you worked in that job?                                                                                                                                                                                        | _____                | _____              |                              |
| 26.                                                                                                                                               | How many hours do you work per week?                                                                                                                                                                                         | _____ hrs/wk         | _____ hrs/wk       |                              |
| 27.                                                                                                                                               | How much do you earn from the employment/job monthly?                                                                                                                                                                        | _____ birr           | _____ birr         |                              |

**Note for data collector: If the participant has not returned to work currently, skip to Q#29.**

28. Where do you get supports in relation to work after the injury?

| <b>Sources of support</b>                                 | <b>Type of support</b>                                         |
|-----------------------------------------------------------|----------------------------------------------------------------|
| <input type="radio"/> Co-workers                          | <input type="checkbox"/> No <input type="checkbox"/> Yes _____ |
| <input type="radio"/> Management/employer                 | <input type="checkbox"/> No <input type="checkbox"/> Yes _____ |
| <input type="radio"/> Trauma care provider                | <input type="checkbox"/> No <input type="checkbox"/> Yes _____ |
| <input type="radio"/> Rehabilitation provider             | <input type="checkbox"/> No <input type="checkbox"/> Yes _____ |
| <input type="radio"/> Family                              | <input type="checkbox"/> No <input type="checkbox"/> Yes _____ |
| <input type="radio"/> Personal network/friends            | <input type="checkbox"/> No <input type="checkbox"/> Yes _____ |
| <input type="radio"/> Spiritual leader/groups/institution | <input type="checkbox"/> No <input type="checkbox"/> Yes _____ |
| <input type="radio"/> Other (specify): _____              |                                                                |

**Unique Identification Code (UIC):** \_\_\_\_\_

29. Dis any of the following job-related demands affected your performance at work post injury?

○ **Pressure/demand from physical Environment:**

- |                                       |                             |                              |
|---------------------------------------|-----------------------------|------------------------------|
| 1. Work space/station inconvenience   | <input type="checkbox"/> No | <input type="checkbox"/> Yes |
| 2. Discomfort with material at work   | <input type="checkbox"/> No | <input type="checkbox"/> Yes |
| 3. Inconvenience for movement         | <input type="checkbox"/> No | <input type="checkbox"/> Yes |
| 4. Discomfort with light/illumination | <input type="checkbox"/> No | <input type="checkbox"/> Yes |
| 5. Noise pollution                    | <input type="checkbox"/> No | <input type="checkbox"/> Yes |
| 6. High temperature                   | <input type="checkbox"/> No | <input type="checkbox"/> Yes |
| 7. Low temperature                    | <input type="checkbox"/> No | <input type="checkbox"/> Yes |
| 8. Other (specify): _____             |                             |                              |

○ **Psychological demand:**

- |                                          |                             |                              |
|------------------------------------------|-----------------------------|------------------------------|
| 9. Poor work controls                    | <input type="checkbox"/> No | <input type="checkbox"/> Yes |
| 10. Unable to cope with work speed       | <input type="checkbox"/> No | <input type="checkbox"/> Yes |
| 11. Inconvenience with work process/flow | <input type="checkbox"/> No | <input type="checkbox"/> Yes |
| 12. Poor control on rest/break periods   | <input type="checkbox"/> No | <input type="checkbox"/> Yes |
| 13. Other (specify): _____               |                             |                              |

○ **Demand from social environment:**

- |                                                |                             |                              |
|------------------------------------------------|-----------------------------|------------------------------|
| 14. Unable to get support when needed          | <input type="checkbox"/> No | <input type="checkbox"/> Yes |
| 15. Poor relationship with supervisor/employer | <input type="checkbox"/> No | <input type="checkbox"/> Yes |
| 16. Poor access to information                 | <input type="checkbox"/> No | <input type="checkbox"/> Yes |
| 17. Dissatisfied with promotion/feedback       | <input type="checkbox"/> No | <input type="checkbox"/> Yes |
| 18. Other (specify): _____                     |                             |                              |

30. Do you prefer to go to/show up at workplace, even though your health condition is not good enough to the extent it compromises your productivity? Why?

- Always: \_\_\_\_\_
- Often: \_\_\_\_\_
- Sometimes: \_\_\_\_\_
- Rarely: \_\_\_\_\_
- Never: \_\_\_\_\_

31. Have you received any compensation or benefits for effects related to the traumatic injury?

- Yes
- Process/partially paid
- Not at all; why? \_\_\_\_\_

32. This is my last question; if there is anything you want to tell or ask me, I am here to listen to you before closing our conversation. Please, it is your turn.

***Thank you for your cooperation and for your time!***



**Unique Identification Code (UIC):** \_\_\_\_\_
